1 **Central Role of Cognitive Control Networks in Weight Loss During Voluntary Calorie**  
2 **Restriction**

3 Selin Neseliler<sup>1</sup>, Wen Hu<sup>2</sup>, Kevin Larcher<sup>1</sup>, Maria Zacchia<sup>1</sup>, Mahsa Dadar<sup>1</sup>, Stephanie G.  
4 Scala<sup>1</sup>, Marie Lamarche<sup>2</sup>, Yashar Zeighami<sup>1</sup>, Stephen C. Stotland<sup>3</sup>, Maurice Larocque<sup>1</sup>, Errol B.  
5 Marliss<sup>2</sup>, and Alain Dagher<sup>\*1</sup>

6 1. Montreal Neurological Institute, McGill University, Montréal, Canada

7 2. Crabtree Nutrition Laboratories, Department of Medicine, McGill University Health Centre  
8 Research Institute, McGill University, Montréal, Canada

9 3. Department of Psychology, McGill University, Montréal, Canada

10 4. Clinique Motivation Minceur, Montréal, Canada

11 \* Lead Contact

12

13 *Word count of summary: 149*

14 *Figures and Tables: 5 Figures*

15 *Supplemental data: 9 Tables, 1 Figure*

16

17 **Address for correspondence:**

18 Alain Dagher, MD

19 Montreal Neurological Institute

20 3801 University St., Montréal QC Canada H3A 2B4

21 email: [alain.dagher@mcgill.ca](mailto:alain.dagher@mcgill.ca)

## 22 **Summary**

23 Insufficient responses to hypocaloric diets have been attributed to hormonal adaptations that  
24 override self-control of food intake. We tested this hypothesis by measuring brain fMRI reactivity  
25 to food cues and circulating energy-balance hormones in 24 overweight/obese participants before,  
26 and 1 and 3 months after starting a calorie restriction diet. Increased activity in prefrontal regions at  
27 month 1 correlated with weight loss at months 1 and 3. Weight loss was also correlated with  
28 increased plasma ghrelin and decreased leptin at month 1, and these changes were associated with  
29 greater food cue reactivity in reward-related brain regions. However, the reduction in leptin did not  
30 counteract weight loss; indeed, it was correlated with further weight loss at month 3. Activation in a  
31 network of prefrontal regions associated with self-control could contribute to individual differences  
32 in weight loss and maintenance, whereas we failed to find that the hormonal adaptations play a  
33 major role.

34

35

36

37

38

39

40

## 41 **Introduction**

42 Weight loss can improve comorbidities and cardiometabolic risk factors associated with obesity.  
43 Two-thirds of the American population have undertaken reducing diets at least once (Gudzune et  
44 al., 2015). However, achieving and maintaining weight loss remain challenging (Anastasiou et al.,  
45 2015). Several studies indicate that high-order executive cognitive processes implicated in self-  
46 regulation play an important role in healthy food decisions and weight management (Gettens and  
47 Gorin, 2017; Michaud et al., 2017; Stoeckel et al., 2017). However, hormonal responses to  
48 negative energy during calorie restriction balance can modulate the activity of brain systems  
49 implicated in feeding in favor of increased calorie intake (Berthoud et al., 2012). In humans, it  
50 remains to be tested if the changes in energy balance signals during calorie restriction can modulate  
51 the brain networks associated with food intake, override self-control, and oppose weight loss.

52 Brain circuitry underlying food decisions can be divided into three interacting systems: (1) a  
53 homeostatic system centered around the hypothalamus; (2) a reward-related appetitive network  
54 including the striatum and the ventromedial prefrontal cortex (vmPFC) that encodes the subjective  
55 value of food cues; (3) an executive control network that relies on the function of interconnected  
56 prefrontal regions including the anterior cingulate cortex (ACC), dorsolateral prefrontal cortex  
57 (dlPFC), inferior frontal gyrus (IFG), and posterior parietal (PP) cortex (Dagher, 2012; Ochner et  
58 al., 2013). Cognitive control, defined here as the ability to restrict calorie intake and to sustain  
59 weight maintenance, is thought to rely on these executive structures. It is proposed that cognitive  
60 control ability mediates the relationship between weight loss intention and action (Gettens and  
61 Gorin, 2017). The dlPFC and IFG have been repeatedly implicated in dietary self-control, studied

62 with functional magnetic resonance imaging (fMRI) utilizing blood-oxygen-level-dependent  
63 (BOLD) contrast. Activation of the dlPFC and IFG is seen when subjects are asked to voluntarily  
64 suppress the desire to eat in response to food cues (Batterink et al., 2010; Hollmann et al., 2012),  
65 and predicts subsequent reduced food intake outside the lab (Lopez et al., 2014, 2017). FMRI  
66 studies also support a model according to which dlPFC and IFG downregulate the activity of value-  
67 encoding regions (e.g. vmPFC) when participants choose healthy over unhealthy foods or regulate  
68 their food cravings (Hare et al., 2009, 2011). The relative balance of activity in regions associated  
69 with self-regulation over those associated with reward has been used to compute a brain-derived  
70 measure of self-regulation ability, which relates to healthier real-life food choices in dieters and  
71 non-dieters (Lopez et al., 2014, 2017). This has led to dual systems theories where behavioral  
72 outcomes depend on the balance between self-control and reactivity to reward. Although few  
73 studies have examined brain activity longitudinally in individuals undergoing calorie restriction,  
74 there is some support for the role of dlPFC in successful weight loss (Weygandt et al., 2013) and of  
75 ventral striatum activity in worse outcomes (Murdaugh et al., 2012).

76 According to the dual systems theory, the magnitude of weight loss during calorie restriction will be  
77 related to the following fMRI findings: (1) increased brain activity in regions associated with  
78 cognitive control, (2) increased connectivity of these areas to regions ascribed to value processing  
79 (e.g., vmPFC and striatum), and (3) downregulation of activity in these value-related brain regions.  
80 However, central nervous system networks are also modulated by internal states, such as current  
81 energy balance status (Neseliler et al., 2017; Rangel, 2013). During calorie restriction, ghrelin and  
82 leptin reflect changes in energy balance. Leptin plasma levels decline rapidly in response to calorie

83 restriction, and more slowly with reduction of fat mass (Friedman and Mantzoros, 2015). Patients  
84 with leptin deficient states show increased food cue reactivity in the striatum and orbitofrontal  
85 cortex (OFC) compared with controls (Aotani et al., 2012). Striatal BOLD response to food cues  
86 in the striatum is reduced by leptin administration in these patients (Aotani et al., 2012; Farooqi et  
87 al., 2007). In normoleptinemic participants, leptin levels negatively correlate with food cue  
88 reactivity in the striatum (Grosshans et al., 2012) and leptin administration to weight-reduced  
89 subjects results in increased activity in regions associated with cognitive control (Rosenbaum et al.,  
90 2008). These studies suggest that reductions in leptin levels can result in increased activity in the  
91 mesolimbic reward system and reduced activity in brain regions associated with cognitive control.  
92 Conversely, ghrelin - an orexigenic hormone secreted by the stomach - increases rapidly in  
93 response to calorie deficit (Borer et al., 2009). Post-translational modification converts ghrelin to  
94 acyl-ghrelin, its active form (Müller et al., 2015). Ghrelin can increase the neural response to food  
95 cues in regions associated with value and motivation and potentiate food intake (Goldstone et al.,  
96 2014; Malik et al., 2008). During weight loss, the fall in leptin and rise in ghrelin levels could  
97 modulate the activity of brain networks involved in reward signaling to shift the balance towards  
98 increased food intake (Berthoud et al., 2012).

99 We designed this study to test these two predictions on the role of the central nervous system in  
100 voluntary calorie restriction: (1) that activation of cognitive control networks during fMRI would  
101 predict weight loss and (2) that early weight loss should lead to changes in energy-balance signaling  
102 (leptin and ghrelin), which would lead to increased activity in regions associated with reward and  
103 counteract self-control mechanisms. Twenty-four individuals underwent a three-month calorie

104 restriction program with measurement of fMRI and metabolic variables at baseline (before  
105 initiating the diet), and at months 1 and 3. Body weight was also obtained at two years. During  
106 fMRI they viewed 216 pictures of appetizing foods or scenery, and rated them on a 4-point scale.  
107 Our results support the first prediction but not the second.

108

109

## 110 **Results & Discussion**

### 111 ***Calorie restriction resulted in weight loss***

112 The 24 participants (1 Male) had a mean age of 37.2 (SD =  $\pm 8.4$ ) and a mean body mass index  
113 (BMI) at entry of 30.4 (SD =  $\pm 3.2$ ). The personality measures of the study population are listed  
114 in Table S1. We analyzed the changes in weight, physical activity, hunger levels and energy-  
115 balance hormone levels at months 1 and 3 during calorie restriction, compared with baseline  
116 (Fig. 2). All the analyses were conducted using linear mixed effect modeling. Significant  
117 reductions in BMI occurred across the three sessions of calorie restriction ( $F(1,62) = 86.2, p =$   
118  $2.4 \times 10^{-13}$ ). Pairwise comparisons showed the reductions in BMI were significant from baseline  
119 to month 1 ( $F(1,61) = 22.91, p = 1.12 \times 10^{-5}$ , mean weight loss  $2.20 \pm 4.22$  kg), and from month  
120 1 to month 3 ( $F(1,61) = 17.16, p = 0.0001$ , mean weight loss  $1.88 \pm 1.55$  kg) (Fig. 2-A, Table  
121 S2). Self-reported physical activity levels across the sessions did not show significant differences  
122 ( $F(1,31) = 0.31, p = 0.71$ , Table S2). There were no significant differences in hunger assessed by  
123 VAS across the sessions (Table S3).

124

125

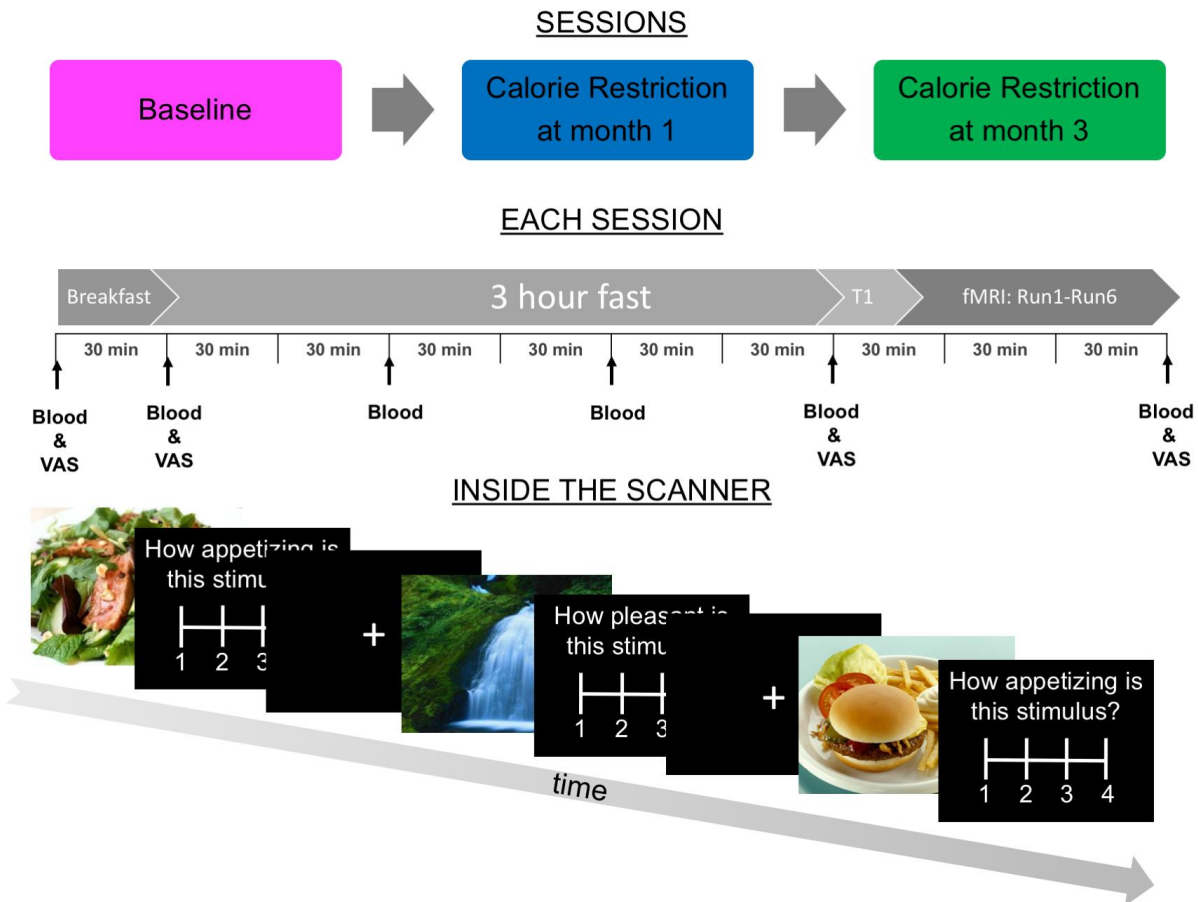

126

127

128 **Figure 1. Experimental Design.**

129 Participants (n=24) were tested three times: at baseline, then at 1 and 3 months during voluntary  
130 calorie restriction. On each scan day, participants ate a standard breakfast three hours prior to  
131 fMRI imaging. Venous blood and self-reported hunger level on a visual analog scale (VAS) were  
132 sampled at the times indicated. Anatomical scanning (T1) was followed by six seven-minute  
133 functional runs. During fMRI participants viewed pictures of foods and scenery followed by a  
134 rating.

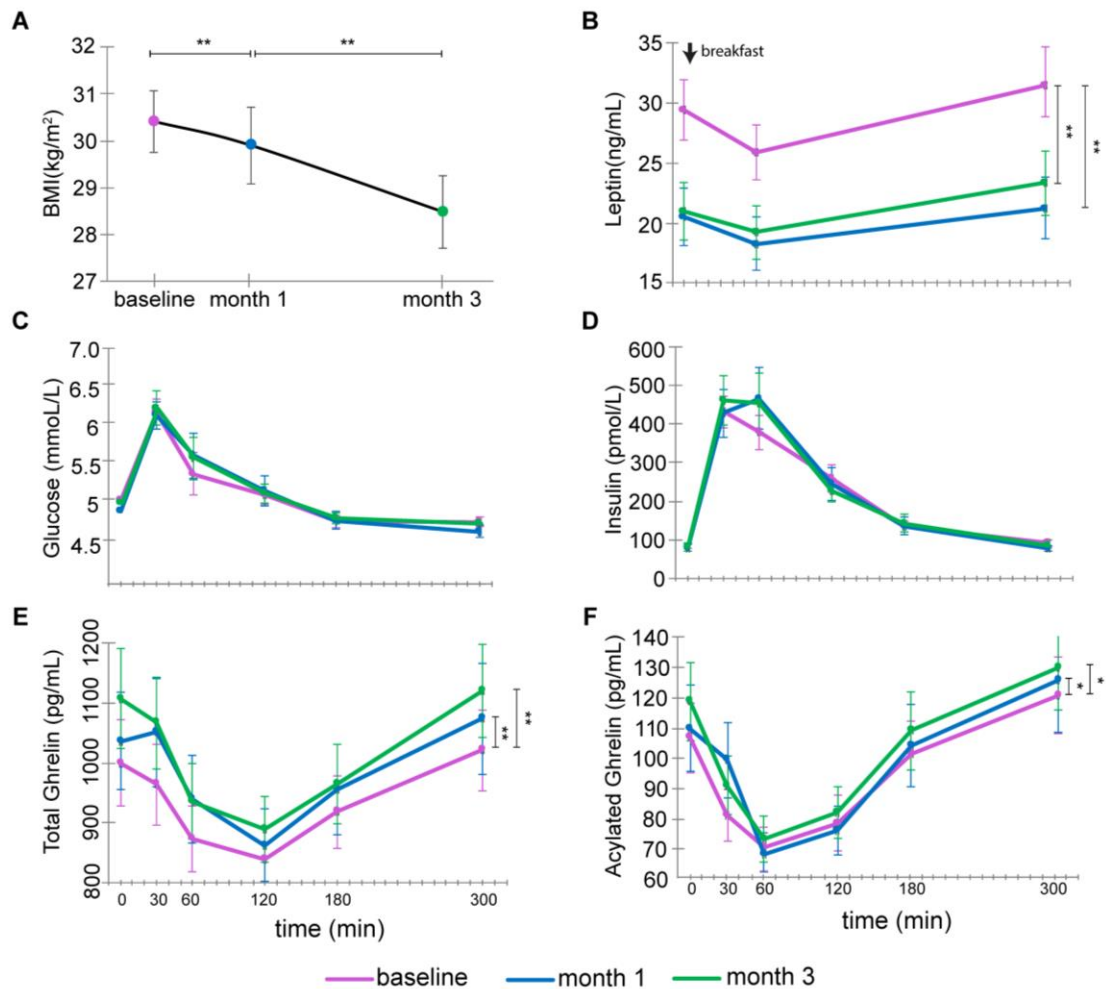

135

136 **Figure 2. Effects of voluntary calorie restriction.**

137 (A) BMI decreased significantly across the sessions. In panels B-F, the plasma concentrations were  
138 measured throughout the experiment (0-300 min). 0 min refers to morning (pre-meal) levels, after  
139 which participants consumed the standard breakfast (shown as an arrow in B). In all the panes, 30  
140 min indicates the response after the breakfast. (B) Leptin decreased at month 1 during the diet  
141 compared to baseline, but was not significantly different at month 3 compared with month 1.  
142 Glucose (C) and Insulin (D) did not show significant differences across sessions. Total ghrelin (E)



143 and acylated ghrelin (F) levels were lower at month 1 and month 3 compared with baseline. Data  
144 are presented as mean  $\pm$  SEM. Statistics are derived from linear mixed models (MATLAB  
145 function fitlme). \* =  $p < 0.05$ ; \*\* =  $p < 0.01$ .

146

### 147 ***Activity in cognitive control networks correlated with weight loss***

148 We hypothesized that weight loss would be related to activity in regions implicated in cognitive  
149 control. In line with this hypothesis, initial weight loss at month 1 was correlated with an increase in  
150 BOLD (month 1 versus baseline) during the food minus scenery contrast in regions associated  
151 with cognitive control such as dlPFC, IFG, dACC, inferior parietal lobule, and caudate (Fig. 3-  
152 A&B, Table S5). This result is in line with studies that showed that cue-related dlPFC activity  
153 correlated with weight loss from dieting (Weygandt et al., 2013) or bariatric surgery (Goldman et  
154 al., 2013). Food cue-reactivity in the network of regions related to cognitive control at month 1 (Fig  
155 3-A) correlated positively with subsequent weight loss from month 1 to 3 ( $r = 0.60$ ,  $p = 0.013$ , Fig.  
156 3-C). Moreover, activity reductions in this network at month 3 (i.e. a return towards baseline)  
157 correlated with weight regain two years later ( $r = -0.64$ ,  $p = 0.014$ , Fig. 3-D). These results suggest  
158 that engagement of prefrontal areas implicated in dietary self-control is correlated with initial weight  
159 loss at months 1 and 3 and weight loss maintenance at two years.

160

161

162

163

164

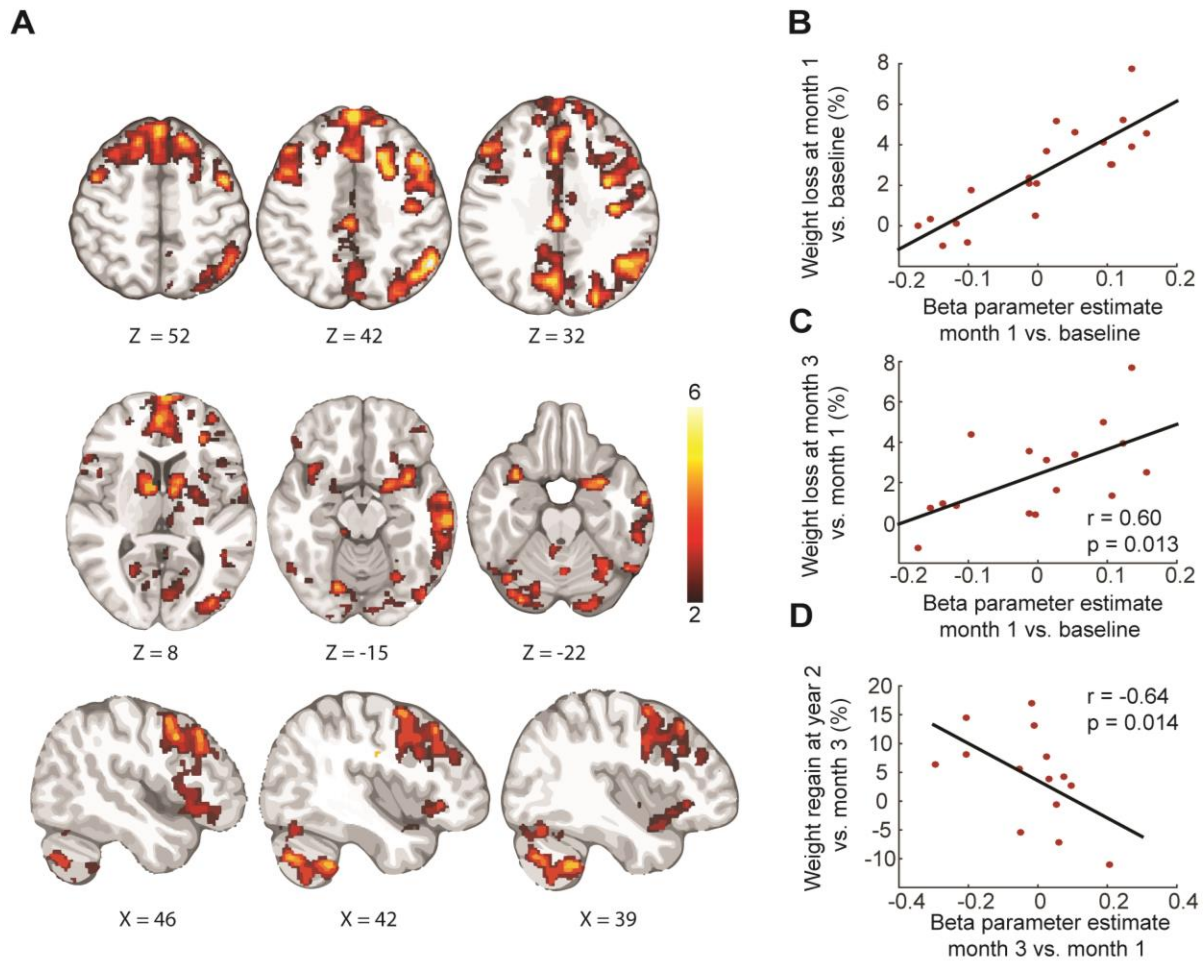

165

166 **Figure 3. Weight loss at month 1 correlated with changes in BOLD in regions associated with**  
167 **cognitive control.**

168 (A) Activation to food cues compared to scenery cues at month 1 vs. baseline correlated with  
169 weight loss ( $p < 0.05$  FWER,  $N = 20$ ). (B) Mean beta estimate of activation to food minus scenery at  
170 month 1 minus baseline derived from the significant cluster (A) versus weight loss between month  
171 1 and baseline. (C) Mean beta estimate of activation to food minus scenery at month 1 minus  
172 baseline derived from the significant cluster (A) versus weight loss from month 3 to month 1 ( $N =$

173 16). (D) Mean beta estimate of activation to food minus scenery at month 3 minus month 1  
174 derived from the significant cluster (A) versus weight regain at two years compared with month 3  
175 (N = 14). The color scale presents t-statistics derived from 5000 permutations of the data. FWER:  
176 Family-Wise Error Rate. X and Z refer to the MNI coordinates in mm.

177

### 178 ***vmPFC BOLD decreased during calorie restriction***

179 Neuro-computational models of decision-making assume that individuals make choices based on  
180 the subjective value assigned to options (Rangel, 2013). As an example, a subjective value signal for  
181 food stimuli might be computed by incorporating aspects of palatability and healthiness. Meta-  
182 analysis reveals that this stimulus value computation is reflected in the vmPFC (Bartra et al., 2013),  
183 and influenced by its connectivity with regions implicated in reward processing, such as the  
184 striatum, and cognitive control, such as the dlPFC and IFG (Hare et al., 2009, 2011; Rangel, 2013).  
185 We tested two competing predictions regarding the change in vmPFC response to food cues  
186 during calorie restriction: (1) it could increase, reflecting greater valuation of food cues due to  
187 negative energy balance; (2) it could show a reduction, reflecting successful self-regulation (Hare et  
188 al., 2009). Food cue reactivity was reduced in vmPFC at month 1 compared to baseline in a region  
189 of interest (ROI) derived from a meta-analysis of subjective value (Bartra et al., 2013) (Fig. 4-A;  
190 Table S6A). Activity in vmPFC in the food minus scenery contrast remained lower than baseline at  
191 month 3 (Fig. 4-B) in line with continued weight loss. There was no difference in vmPFC activation  
192 (food minus scenery) at month 3 compared to month 1.

193

194 ***Food liking decreased during calorie restriction***

195 Subjective liking ratings for food cues relative to the scenery cues showed a similar trend: there was  
196 a significant reduction at month 1 ( $F(1,61) = 283.33, p = 1.34 * 10^{-24}$ ) that persisted at month 3  
197 compared with baseline ( $F(1,61) = 273.73, p = 0.0012$ ). Month 3 liking ratings were not  
198 significantly different from month 1 ( $F(1,61) = 0.23, p = 0.63$ ) (Fig. 4-C). These result align with  
199 previous observations showing that food cravings subside during voluntary calorie restriction  
200 (Martin et al., 2006). Furthermore, liking for food vs. scenery cues correlated with vmPFC food  
201 cue reactivity (linear mixed effects model  $F(1,61) = 13.24, p = 0.0006$ ) across all sessions (Fig. 4-D),  
202 supporting a role for this region in value computation. In sum, both fMRI vmPFC signals and  
203 liking for food cues were reduced during calorie restriction, consistent with previous studies linking  
204 these to self-regulation of appetite (Hare et al., 2009; Wagner et al., 2013).

205

206 ***vmPFC connectivity changed during calorie restriction***

207 The connectivity of the vmPFC (seed region MNI coordinates:  $x = -10, y = 34, z = -12$ , Fig. 4-E),  
208 was reduced at month 1 vs baseline with regions associated with visual processing of food stimuli.  
209 These regions included the lingual gyrus, the lateral and temporal occipital cortex regions (Fig. 4-E,  
210 Table S6B). Focusing on the visual features of valued stimuli has been associated with BOLD  
211 response in these regions (van der Laan et al., 2011; Lim et al., 2011), which have been postulated  
212 to send the visual information to the vmPFC, where an overall subjective value of the stimulus is  
213 computed and utilized for decision making (Lim et al., 2013). Weight loss also correlated with  
214 increased vmPFC connectivity to left dlPFC in regions previously associated with cognitive control

215 (by using a mask generated from the search term “cognitive-control” in the meta-analytical tool  
216 Neurosynth) (Fig.4-F, Table S6C).

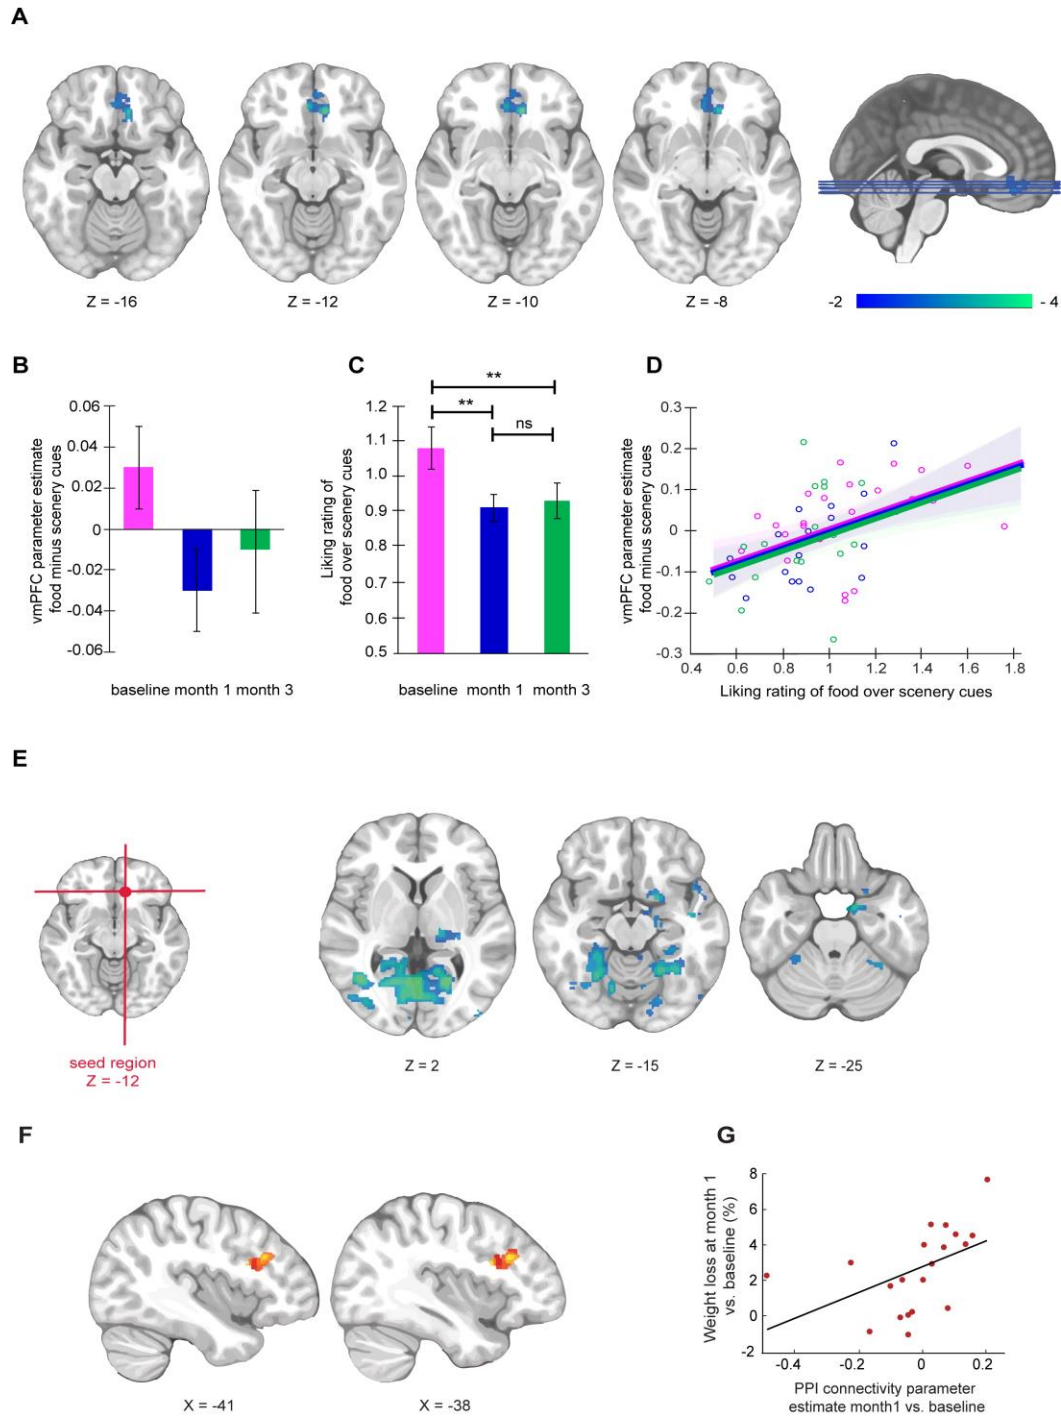

217

218 **Figure 4. vmPFC activity following calorie restriction**

219 (A) Negative peaks: activation to food cues compared to scenery cues at month 1 of the diet  
220 compared to baseline ( $p < 0.05$  FWER, SVC,  $N = 20$ ). (B) Changes in the vmPFC region beta  
221 estimate derived from the entire cluster in A. (C) Liking for food cues relative to scenery cues at  
222 baseline, month 1 and month 3. (D) Mean vmPFC parameter estimate derived from the entire  
223 cluster to food minus scenery cues versus mean liking ratings of food cues relative to scenery cues  
224 ( $F(1,61) = 13.24$ ,  $p = 0.0006$ ). Shaded lines represent 95% confidence intervals derived from the  
225 linear mixed effect model (MATLAB fitlme). (E) PPI analysis with the vmPFC seed revealed that  
226 left vmPFC connectivity is reduced with visual areas at month 1 compared with baseline (displayed  
227  $p < 0.001$ , uncorrected, minimum voxel extent = 10 mm,  $p < 0.05$  FWER corrected in Table S6-C).  
228 (F) Left vmPFC connectivity to left dlPFC and left IFG at month 1 compared with baseline is  
229 positively correlated with weight loss (displayed  $p < 0.001$ , uncorrected, minimum voxel extent = 10  
230 mm,  $p < 0.05$  FWER corrected in Table S6-D). (G) The mean beta estimate derived from the  
231 significant cluster (F) in month 1 compared with baseline versus weight loss between month 1 and  
232 baseline. Data are presented as mean  $\pm$  SEM and statistics are derived from linear mixed models.  
233 SVC: Small Volume Correction. FWER: Family-wise Error Rate. ns: not significant. \*\* =  $p < 0.01$ .  
234 X and Z refer to MNI coordinates in mm.

235

236

237

238

239 ***IFG activity subsided from month 1 to 3 during calorie restriction***

240 These effects tended to subside from month 1 to 3, when there was a reduction in activity in right  
241 IFG/Frontal Opercular Cortex (Fig. S1-A; Table S6D), and reduced vmPFC connectivity to left  
242 dlPFC (Fig. S1-B; Table S7). Participants who showed more reduction in right IFG BOLD at  
243 month 3 vs. month 1 showed greater weight-regain at 2-year follow-up ( $r = -0.61$ ,  $p = 0.02$ ,  $n=14$ ,  
244 Fig. S1-B).

245  
246 These results support a model in which calorie restriction entails changes in value computations in  
247 vmPFC due to reduced connectivity with visual areas involved in computing attributes of stimuli  
248 (Lim et al., 2013) and increased connectivity with prefrontal areas implicated in self-control  
249 (Rangel, 2013). These results build on previous work showing that dlPFC activity and its  
250 connectivity to vmPFC correlates with self-regulation and reduced food consumption (Hare et al.,  
251 2009; Lopez et al., 2014). In this study, changes in brain activity in these regions predicted  
252 subsequent real-life outcomes and correlated with the magnitude of weight loss. However, we  
253 observed that both the activity in regions associated with cognitive control as well as their  
254 connectivity to vmPFC were reduced at month 3 compared with month 1 suggesting that BOLD  
255 changes in cognitive control networks may not be sustained, which appears to correlate with  
256 subsequent weight regain (Fig. 3-D).

257

258 ***Leptin decreased, and ghrelin increased during calorie restriction***

259 Leptin and ghrelin both showed adaptations to weight loss. Plasma leptin showed significant effects  
260 for both session ( $F(1,188) = 81.91$ ,  $p = 1.79 \times 10^{-16}$ ) and sampling time ( $F(1, 188) = 7.29$ ,  $p =$

261 0.008) (Fig. 2-B). Levels decreased from baseline at both month 1 ( $F(1, 188) = 100.52, p = 3.27 * 10^{-19}$ ) and month 3 ( $F(1, 188) = 88.27, p = 2.03 * 10^{-17}$ ), with no change between month 1 and 3 ( $F(1, 188) = 0.34, p = 0.56$ ). There was a decrease from time 0 to 60 min after breakfast ( $F(1, 187) = 8.10, p = 0.005$ ), followed by an increase post-scan ( $F(1, 187) = 19.04, p = 2.12 * 10^{-5}$ ), to levels not significantly different from baseline ( $F(1, 187) = 2.30, p = 0.13$ ).

266  
267 Total plasma ghrelin levels showed a main session effect with increase at month 1 ( $F(1,379) = 27.58, p = 2.52 * 10^{-7}$ ), remaining high at month 3 ( $F(1,379) = 26.48, p = 4.29 * 10^{-7}$ ), with no change between months 1 and 3 ( $F(1,379) = 0.017, p = 0.90$ ) (Fig. 2-E). Levels decreased to a nadir at 120 min after the breakfast ( $F(1,376) = 46.5, p = 4.54 * 10^{-11}$ ) then rising, the increase being significant from 120 to 180 min ( $F(1,376) = 18.01, p = 2.77 * 10^{-5}$ ), yet lower than at time 0 ( $F(1,376) = 46.5, p = 4.54 * 10^{-11}$ ). During the scan ghrelin increased further ( $F(1,376) = 41.81, p = 3.11 * 10^{-10}$ ), to a level not different from time 0 ( $F(1,376) = 1.6, p = 0.21$ ).

274  
275 Plasma acyl-ghrelin (Fig.2-F) showed a main effect of increase at month 1 ( $F(1,379) = 5.00, p = 0.026$ ), remaining elevated at month 3 relative to baseline ( $F(1,379) = 4.27, p = 0.039$ ). They were not different between months 1 and 3 ( $F(1,379) = 0.025, p = 0.87$ ). As expected, levels decreased markedly by 60 minutes following breakfast ( $F(1,376) = 22.63, p = 2.81 * 10^{-6}$ ) then rose progressively thereafter. Levels at the end of scan (300 min) were not different than at time 0 ( $F(1, 376) = 2.2, p = 0.14$ ), but increased during the scan (180 vs. 300 min) ( $F(1, 376) = 20.39, p = 8.46 * 10^{-6}$ ).

282



283 The magnitude of month 1 weight loss was correlated with pre-meal log leptin and ghrelin levels. It  
284 was negatively correlated with pre-meal log leptin ( $r = -0.78$ ,  $p = 1.56 \times 10^{-5}$ , Fig. 5-A), and positively  
285 with pre-meal total ghrelin levels at month 1 ( $r = 0.67$ ,  $p = 7.41 \times 10^{-4}$ , Fig. 5-B) but not with acyl-  
286 ghrelin levels ( $r = 0.20$ ,  $p = 0.38$ ). The effects remained at month 3 when weight loss compared  
287 with baseline correlated inversely with pre-meal leptin levels ( $r = -0.86$ ,  $p = 5.39 \times 10^{-6}$ ) and  
288 positively with pre-meal acyl ghrelin ( $r = 0.47$ ,  $p = 0.048$ ) and total ghrelin levels ( $r = 0.56$ ,  $p =$   
289  $0.016$ ).

290

291 No significant effects of session on glucose and insulin levels were detected (Fig. 2 C-D). In  
292 addition, insulin sensitivity as assessed by homeostatic model assessment (HOMA) was not  
293 significantly different across sessions ( $F(1,61) = 1.37$ ,  $p = 0.25$ , Table S2). These results are  
294 consistent with insulin resistance playing a minor role in the main outcome variables in this study.

295

296 Leptin is produced by adipocytes. Its plasma levels fall quickly during negative energy balance, and  
297 more gradually with diminished fat mass (Friedman & Mantzoros, 2015). The orexigenic hormone  
298 ghrelin is increased in response to energy deficit (Borer et al., 2009; Müller et al., 2015). In the  
299 current study, leptin levels decreased while ghrelin levels increased at month 1, consistent with  
300 previous weight loss studies (Wing et al., 1996). Despite continued weight loss, ghrelin and leptin  
301 levels did not change further at month 3, as described previously (Crujeiras et al., 2010; Sumithran  
302 et al., 2011) These results suggest that, on average, our participants were in negative energy balance  
303 at month 1 and month 3 compared with baseline.

304

305 ***Ghrelin and leptin changes correlated with BOLD in reward regions***

306 We tested the hypothesis that weight loss-induced changes in ghrelin and leptin would increase  
307 brain activation of reward related areas while viewing food cues, and that this would promote over-  
308 eating and diet failure. Previous studies found that leptin administration reduced food cue  
309 reactivity in leptin deficient patients (Aotani et al., 2012; Farooqi et al., 2007); while ghrelin  
310 administration increased food cue reactivity (Malik et al., 2008) in regions associated with food  
311 value and motivation.

312 Consistent with previous studies (Goldstone et al., 2014; Kroemer et al., 2013; Malik et al., 2008),  
313 increased pre-meal ghrelin levels correlated with increased activity at month 1 in mPFC, caudate  
314 and visual cortex, all areas associated with appetitive processing (Fig. 5C,E-F; Table S8). Weight  
315 loss-induced reductions in pre-meal leptin level also correlated with increased activity in mPFC and  
316 visual cortex (Fig. 5C-D, Table S9), suggesting that metabolic adaptations at month 1 of  
317 contributed to increased food cue reactivity at month 1 compared with baseline.

318

319 ***Ghrelin and leptin changes did not oppose continued weight loss***

320 The next question we addressed was whether negative energy balance signals could counteract  
321 participants' efforts to continue losing weight by increasing value-related food cue reactivity and  
322 food intake. Contrary to our hypothesis, leptin reductions at month 1 vs. baseline correlated with  
323 further weight loss at month 3 vs. month 1 ( $r = -0.69$ ,  $p = 0.0032$ , Fig. 5-G) and a lower weight at two  
324 years compared with baseline ( $r = 0.57$ ,  $p = 0.02$ , Fig. 5-H). Increases in ghrelin levels did not  
325 significantly relate to weight change at 3 month ( $r = 0.43$ ,  $p = 0.099$ ), or at two years compared with  
326 baseline ( $r = -0.34$ ,  $p = 0.20$ ), however the direction of the effect was not consistent with ghrelin

327 causing an increase in weight. These results suggest that leptin reductions and ghrelin increases did  
328 not oppose continued weight loss, even though they increased reward related food cue-reactivity.  
329 Indeed, leptin reductions predicted greater subsequent weight loss. This is likely because leptin  
330 reductions were greater in individuals with better appetite control, who lost more weight.

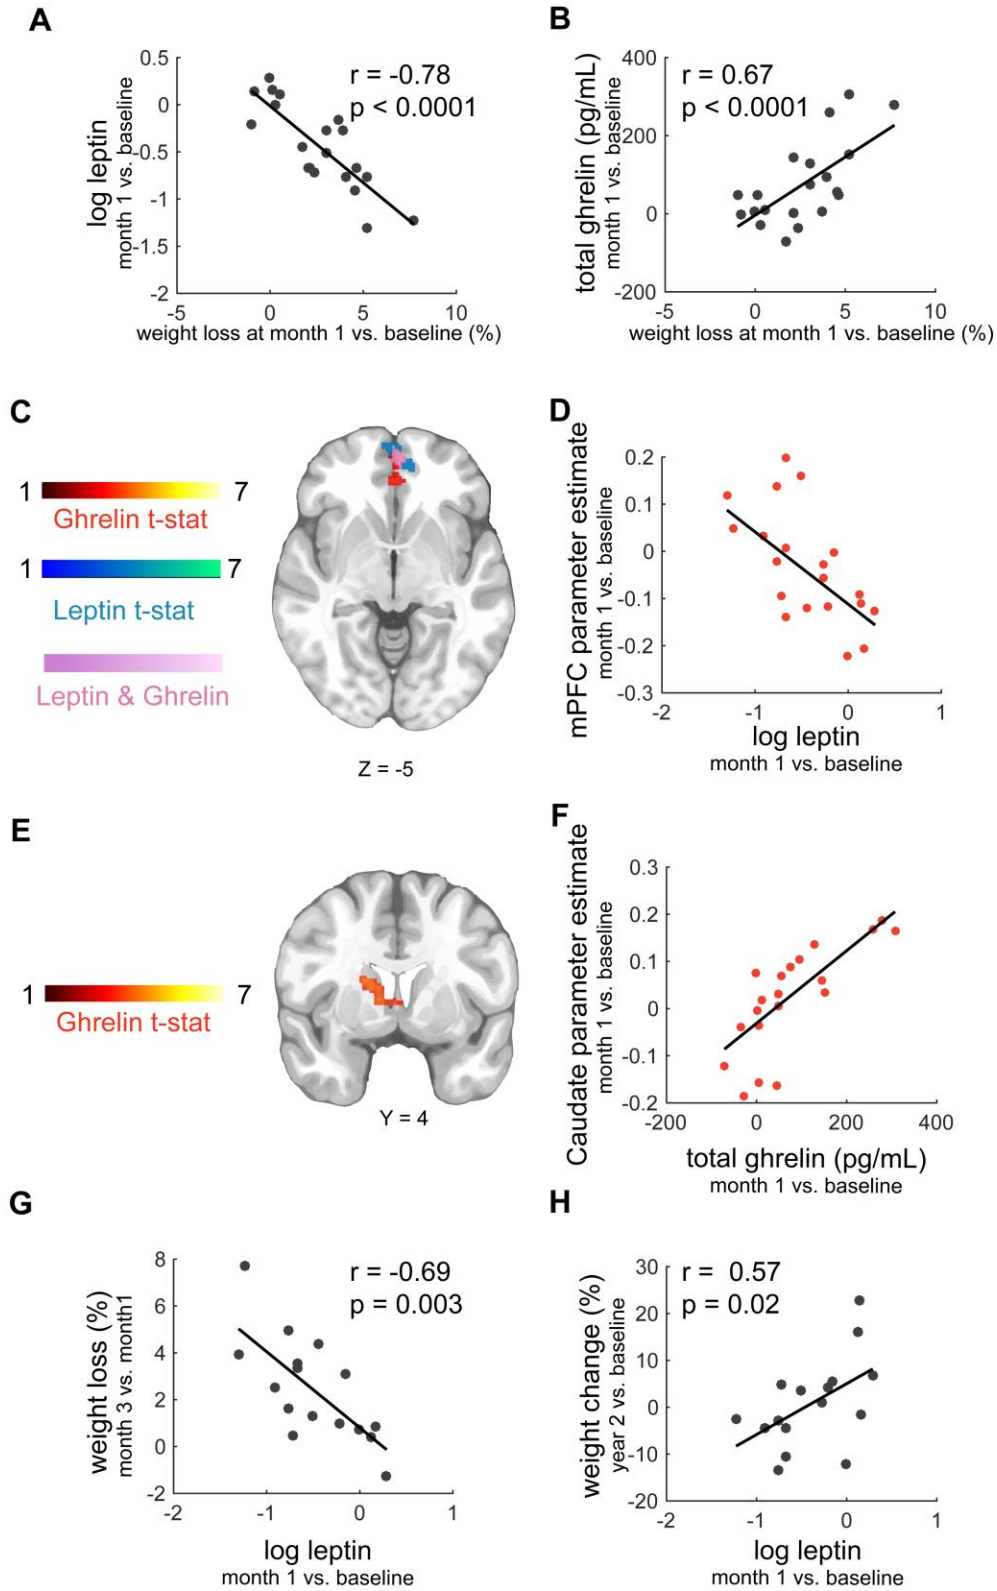

332 **Figure.5 Correlations with leptin and ghrelin levels**

333 (A) Weight loss at month 1 vs. baseline versus pre-meal plasma leptin and (B) total ghrelin at  
334 month 1 vs. baseline. (C) Correlation of food minus scenery activation at month 1 vs. baseline and  
335 the increase in pre-meal ghrelin levels (orange); and the reduction in pre-meal log leptin levels  
336 (blue) at month 1 vs. baseline. Pink regions display areas significant in both analyses (displayed  $p$   
337  $<0.05$  FWER, Table S6A). (D) Depiction of the correlation from panel C. The mean beta  
338 parameter estimate is derived from the orange cluster in panel C at month 1 vs. baseline. (E)  
339 Correlation of food minus scenery activation at month 1 vs. baseline and the increase in pre-meal  
340 ghrelin levels (orange); (displayed  $p <0.05$  FWER, Table S6A). (F) Depiction of the correlation  
341 from panel E. The mean beta parameter estimate was derived from the orange cluster in panel E  
342 (G) Pre-meal log leptin levels at month 1 vs. baseline correlated inversely with future weight loss at  
343 month 3 vs. month 1 and (H) negatively with weight at two years compared with baseline. The  
344 color scales represent t-statistics derived from 5000 permutations of the data. FWER: Family-Wise  
345 Error Rate. Y and Z refer to MNI coordinates in mm.

346

347 In this study, leptin and ghrelin adaptations to weight loss did not explain why diets are  
348 unsustainable in the long term. Our results suggest that the reduction of leptin at month 1 are a  
349 marker of successful weight loss, correlating with future weight loss and/or maintenance. Indeed, in  
350 the Look Ahead study, weight loss at month 1 predicted reduced weight up to 8 years later (Unick  
351 et al., 2015). Our results are not consistent with the prevalent view that reduced leptin levels during  
352 energy restriction promote increased food intake and obesity, a theory that has been recently  
353 questioned (Flier and Maratos-Flier, 2017). A recent meta-analysis of reduced leptin levels as a

354 predictor for weight regain was also inconclusive (Strohacker et al., 2014) and leptin  
355 pharmacotherapy in the treatment of obesity has produced disappointing results (Bray, 2014;  
356 Korner et al., 2013). All together, these results do not support pharmacologically increasing leptin  
357 signaling as an adjunct target for treatment of obesity in conjunction with calorie restriction.  
358 However, more research is needed to test the role of leptin for the treatment of obesity in  
359 normoleptinemic patients (Friedman and Mantzoros, 2015; Rosenbaum and Leibel, 2014).

360

## 361 **Conclusions**

362 Weight loss is highly variable among individuals embarking on weight-reduction programs and  
363 likely depends on interactions between peripheral and central mechanisms of appetite control.  
364 While changes in short- and long-term energy signals due to weight loss can affect food intake to  
365 maintain a stable weight (Ryan, Woods, & Seeley, 2012), in humans food intake is also under the  
366 influence of cognitive goals and self-regulation. It is important to note that cognitive control  
367 changes were not measured here but inferred from the activation of lateral prefrontal areas while  
368 viewing food items. Nonetheless, our principal findings are that changes in neural correlates of  
369 cognitive control from baseline to month 1 were associated with the magnitude of weight loss at  
370 months 1 and 3, while reduced activity from months 1 to 3 in these regions correlated with  
371 subsequent weight regain. In addition, increased ghrelin and reduced leptin levels were observed  
372 during calorie restriction, but these responses, while increasing food-cue reactivity in reward related  
373 brain regions, did not counteract further weight-loss. Thus, we failed to show that hormonal  
374 adaptations to negative energy balance play a significant negative role in weight loss success and its

375 maintenance. Therefore, it is possible that strategies that target the central brain networks involved  
376 in cognitive control might be more effective as weight loss strategies.

377

## 378 **Limitations**

379 Although our small sample size is common for within-design neuroimaging studies, it limits our  
380 statistical power and the generalizability of our findings. In addition, for some participants we  
381 utilized self-reported weight at 2 years, which might have biased our results. Second, we only tested  
382 total ghrelin, acyl-ghrelin, leptin, glucose and insulin levels. Therefore, we cannot generalize our  
383 results to other metabolic signaling molecules such as glucagon-like peptide (GLP-1). Third, the  
384 communication between the metabolic hormones and the brain might have changed as a function  
385 of weight status (Ravussin et al, 2014); e.g., leptin resistance might have been present in our  
386 sample. We did not test for hormonal resistance, and therefore cannot determine how much  
387 changes in peripheral signaling affected brain responses at different time points. Nonetheless,  
388 leptin and ghrelin did have the expected effects on cue-reactivity in appetitive brain regions.  
389 Another limitation is the lack of a control group. Further studies are justified, and could include  
390 larger cohorts, a control group, monitoring of daily food intake and activity, indirect calorimetry,  
391 more precise estimation of insulin sensitivity, and additional known modulators of food intake and  
392 activity.

393

## 394 **Acknowledgments**

395 We thank Dr. Isabelle Garcia-Garcia and Dr. Andreeane Michaud for critically reading the  
396 manuscript. AD is supported by Canadian Institutes of Health Research (CIHR) Foundation  
397 Scheme. SN is supported by the Frederick Banting and Charles Best Canada Graduate  
398 Scholarship (CIHR). This project was funded by CIHR Operating Grant number 219271.

399

## 400 **Author Contributions**

401 Conceptualization, S.N, W.H., E.B.M and A.D.; Methodology, S.N., W.H., K.L, M.L., E.B.M.,  
402 M.D. and Y.Z.; Software, S.N., M.D. and K.L.; Investigation, S.N., W.H, M.Z., S.G.S., M.L.,  
403 S.C.S, M.L.; Writing – Original Draft, S.N. and A.D.; Writing – Review & Editing, S.N., M.D.,  
404 E.B.M. and A.D.; Funding Acquisition, E.M. and A.D.; Resources, E.B.M., M.L., S.S. and A.D.;  
405 Supervision, E.B.M. and A.D.

406

## 407 **Declarations of Interest**

408 Maurice Larocque is the founder and owner of Clinique Motivation Minceur. He recruited the  
409 participants, but did not fund the study. The other authors declare no conflict of interest.

410

## 411 **References**

412 Anastasiou, C.A., Karfopoulou, E., and Yannakoulia, M. (2015). Weight regaining: From  
413 statistics and behaviors to physiology and metabolism. *Metabolism*. 64, 1395–1407.

414 Andersson, J.L.R., Jenkinson, M., Smith, S., and Andersson, J. (2007). Non-linear optimisation



415 FMRIB Technial Report TR07JA1.

416 Aotani, D., Ebihara, K., Sawamoto, N., Kusakabe, T., Aizawa-Abe, M., Kataoka, S., Sakai, T.,  
417 Iogawa, H., Ebihara, C., Fujikura, J., et al. (2012). Functional magnetic resonance imaging  
418 analysis of food-related brain activity in patients with lipodystrophy undergoing leptin  
419 replacement therapy. *J. Clin. Endocrinol. Metab.* *97*, 3663–3671.

420 Bartra, O., McGuire, J.T., and Kable, J.W. (2013). The valuation system: a coordinate-based  
421 meta-analysis of BOLD fMRI experiments examining neural correlates of subjective value.  
422 *Neuroimage* *76*, 412–427.

423 Batterink, L., Yokum, S., and Stice, E. (2010). Body mass correlates inversely with inhibitory  
424 control in response to food among adolescent girls: an fMRI study. *Neuroimage* *52*, 1696–1703.

425 Beck A.T., B.R.W. (1972). Screening depressed patients in family practice: A rapid technique.  
426 *Postgrad. Med.* *52*, 81–85.

427 Beckmann, C.F., Jenkinson, M., and Smith, S.M. (2003). General multilevel linear modeling for  
428 group analysis in FMRI. *Neuroimage* *20*, 1052–1063.

429 Berthoud, H.-R., Zheng, H., and Shin, A.C. (2012). Food reward in the obese and after weight  
430 loss induced by calorie restriction and bariatric surgery. *Ann. N. Y. Acad. Sci.* *1264*, 36–48.

431 Borer, K.T., Wuorinen, E., Ku, K., and Burant, C. (2009). Appetite responds to changes in meal  
432 content, whereas ghrelin, leptin, and insulin track changes in energy availability. *J. Clin.*  
433 *Endocrinol. Metab.* *94*, 2290–2298.

434 Bray, G.A. (2014). Medical treatment of obesity: The past, the present and the future. *Best Pract.*  
435 *Res. Clin. Gastroenterol.* *28*, 665–684.

436 Carver, C.S., and White, T.L. (1994). Behavioral inhibition, behavioral activation, and affective

437 responses to impending reward and punishment: The BIS/BAS Scales. *J. Pers. Soc. Psychol.* *67*,  
438 319–333.

439 Cohen, S., Kamarck, T., and Mermelstein, R. (1983). A global measure of perceived stress. *J.*  
440 *Health Soc. Behav.* *24*, 385–396.

441 Crujeiras, A.B., Goyenechea, E., Abete, I., Lage, M., Carreira, M.C., Martínez, J.A., and  
442 Casanueva, F.F. (2010). Weight Regain after a Diet-Induced Loss Is Predicted by Higher  
443 Baseline Leptin and Lower Ghrelin Plasma Levels. *J. Clin. Endocrinol. Metab.* *95*, 5037–5044.

444 Dagher, A. (2012). Functional brain imaging of appetite. *Trends Endocrinol. Metab.* *23*, 250–  
445 260.

446 Eskildsen, S.F., Coupé, P., Fonov, V., Manjón, J. V., Leung, K.K., Guizard, N., Wassef, S.N.,  
447 Østergaard, L.R., Collins, D.L., and Alzheimer’s Disease Neuroimaging Initiative (2012).  
448 BEaST: Brain extraction based on nonlocal segmentation technique. *Neuroimage* *59*, 2362–  
449 2373.

450 Farooqi, I.S., Bullmore, E., Keogh, J., Gillard, J., O’Rahilly, S., and Fletcher, P.C. (2007). Leptin  
451 regulates striatal regions and human eating behavior. *Science* *317*, 1355.

452 Flier, J.S., and Maratos-Flier, E. (2017). Leptin’s Physiologic Role: Does the Emperor of Energy  
453 Balance Have No Clothes? *Cell Metab.* *26*, 24–26.

454 Friedman, J.M., and Mantzoros, C.S. (2015). 20 years of leptin: From the discovery of the leptin  
455 gene to leptin in our therapeutic armamentarium. *Metabolism.* *64*, 1–4.

456 Gettens, K.M., and Gorin, A.A. (2017). Executive function in weight loss and weight loss  
457 maintenance: a conceptual review and novel neuropsychological model of weight control. *J.*  
458 *Behav. Med.* 1–15.

459 Goldstone, A.P., Prechtel, C.G., Scholtz, S., Miras, A.D., Chhina, N., Durighel, G., Deliran, S.S.,  
460 Beckmann, C., Ghatei, M.A., Ashby, D.R., et al. (2014). Ghrelin mimics fasting to enhance  
461 human hedonic, orbitofrontal cortex, and hippocampal responses to food. *Am. J. Clin. Nutr.* *99*,  
462 1319–1330.

463 Grosshans, M., Vollmert, C., Vollstädt-Klein, S., Tost, H., Leber, S., Bach, P., Bühler, M., von  
464 der Goltz, C., Mutschler, J., Loeber, S., et al. (2012). Association of leptin with food cue-induced  
465 activation in human reward pathways. *Arch. Gen. Psychiatry* *69*, 529–537.

466 Gudzone, K.A., Doshi, R.S., Mehta, A.K., Chaudhry, Z.W., Jacobs, D.K., Vakil, R.M., Lee, C.J.,  
467 Bleich, S.N., and Clark, J.M. (2015). Efficacy of Commercial Weight-Loss Programs: An  
468 Updated Systematic Review. *Ann. Intern. Med.* *162*, 501–512.

469 Hare, T.A., Camerer, C.F., and Rangel, A. (2009). Self-Control in Decision-Making Involves  
470 Modulation of the vmPFC Valuation System. *324*.

471 Hare, T.A., Malmaud, J., and Rangel, A. (2011). Focusing attention on the health aspects of  
472 foods changes value signals in vmPFC and improves dietary choice. *J. Neurosci.* *31*, 11077–  
473 11087.

474 Hollmann, M., Hellrung, L., Pleger, B., Schlögl, H., Kabisch, S., Stumvoll, M., Villringer, A.,  
475 and Horstmann, A. (2012). Neural correlates of the volitional regulation of the desire for food.  
476 *Int. J. Obes. (Lond).* *36*, 648–655.

477 Hosoda, H., and Kangawa, K. (2012). Standard sample collections for blood ghrelin  
478 measurements. *Methods Enzymol.* *514*, 113–126.

479 Jenkinson, M., Bannister, P., Brady, M., and Smith, S. (2002). Improved optimization for the  
480 robust and accurate linear registration and motion correction of brain images. *Neuroimage* *17*,

481 825–841.

482 Jenkinson, M., Beckmann, C.F., Behrens, T.E.J., Woolrich, M.W., and Smith, S.M. (2012). FSL.

483 *Neuroimage* 62, 782–790.

484 Korner, J., Conroy, R., Febres, G., McMahon, D.J., Conwell, I., Karmally, W., and Aronne, L.J.

485 (2013). Randomized double-blind placebo-controlled study of leptin administration after gastric

486 bypass. *Obesity (Silver Spring)*. 21, 951–956.

487 Kroemer, N.B., Krebs, L., Kobiella, A., Grimm, O., Pilhatsch, M., Bidlingmaier, M.,

488 Zimmermann, U.S., and Smolka, M.N. (2013). Fasting levels of ghrelin covary with the brain

489 response to food pictures. *Addict. Biol.* 18, 855–862.

490 van der Laan, L.N., de Ridder, D.T.D., Viergever, M. a., and Smeets, P. a M. (2011). The first

491 taste is always with the eyes: A meta-analysis on the neural correlates of processing visual food

492 cues. *Neuroimage* 55, 296–303.

493 Lim, S.-L., O’Doherty, J.P., and Rangel, A. (2011). The decision value computations in the

494 vmPFC and striatum use a relative value code that is guided by visual attention. *J. Neurosci.* 31,

495 13214–13223.

496 Lim, S.-L., O’Doherty, J.P., and Rangel, A. (2013). Stimulus value signals in ventromedial PFC

497 reflect the integration of attribute value signals computed in fusiform gyrus and posterior

498 superior temporal gyrus. *J. Neurosci.* 33, 8729–8741.

499 Lopez, R.B., Hofmann, W., Wagner, D.D., Kelley, W.M., and Heatherton, T.F. (2014). Neural

500 Predictors of Giving in to Temptation in Daily Life. *Psychol. Sci.* 25, 1337–1344.

501 Lopez, R.B., Chen, P.-H.A., Huckins, J.F., Hofmann, W., Kelley, W.M., and Heatherton, T.F.

502 (2017). A balance of activity in brain control and reward systems predicts self-regulatory

503 outcomes. *Soc. Cogn. Affect. Neurosci.* 12, 832–838.

504 Lowe, M.R., Butryn, M.L., Didie, E.R., Annunziato, R.A., Thomas, J.G., Crerand, C.E., Ochner,  
505 C.N., Coletta, M.C., Bellace, D., Wallaert, M., et al. (2009). The Power of Food Scale. A new  
506 measure of the psychological influence of the food environment. *Appetite* 53, 114–118.

507 Malik, S., McGlone, F., Bedrossian, D., and Dagher, A. (2008). Ghrelin Modulates Brain  
508 Activity in Areas that Control Appetitive Behavior. *Cell Metab.* 7, 400–409.

509 Martin, C.K., O’Neil, P.M., and Pawlow, L. (2006). Changes in Food Cravings during Low-  
510 Calorie and Very-Low-Calorie Diets\*. *Obesity* 14, 115–121.

511 Michaud, A., Vainik, U., Garcia-Garcia, I., and Dagher, A. (2017). Overlapping Neural  
512 Endophenotypes in Addiction and Obesity. *Front. Endocrinol. (Lausanne)*. 8, 127.

513 Müller, T.D., Nogueiras, R., Andermann, M.L., Andrews, Z.B., Anker, S.D., Argente, J.,  
514 Batterham, R.L., Benoit, S.C., Bowers, C.Y., Broglio, F., et al. (2015). Ghrelin. *Mol. Metab.* 4,  
515 437–460.

516 Murdaugh, D.L., Cox, J.E., Cook, E.W., and Weller, R.E. (2012). fMRI reactivity to high-calorie  
517 food pictures predicts short- and long-term outcome in a weight-loss program. *Neuroimage* 59,  
518 2709–2721.

519 Neseliler, S., Han, J., and Dagher, A. (2017). The Use of Functional Magnetic Resonance  
520 Imaging in the Study of Appetite and Obesity. *Appet. Food Intake* 2, 117–134.

521 O’Reilly, J.X., Woolrich, M.W., Behrens, T.E.J., Smith, S.M., and Johansen-Berg, H. (2012).  
522 Tools of the trade: psychophysiological interactions and functional connectivity. *Soc. Cogn.*  
523 *Affect. Neurosci.* 7, 604–609.

524 Ochner, C.N., Barrios, D.M., Lee, C.D., and Pi-Sunyer, F.X. (2013). Biological mechanisms that

525 promote weight regain following weight loss in obese humans. *Physiol. Behav.* *120*, 106–113.

526 Rangel, A. (2013). Regulation of dietary choice by the decision-making circuitry. *Nat. Neurosci.*  
527 *16*, 1717–1724.

528 Ravussin, Y., LeDuc, C.A., Watanabe, K., Mueller, B.R., Skowronski, A., Rosenbaum, M., and  
529 Leibel, R.L. (2014). Effects of chronic leptin infusion on subsequent body weight and  
530 composition in mice: Can body weight set point be reset? *Mol. Metab.* *3*, 432–440.

531 Rosenbaum, M., and Leibel, R.L. (2014). 20 years of leptin: role of leptin in energy homeostasis  
532 in humans. *J. Endocrinol.* *223*, T83-96.

533 Rosenbaum, M., Sy, M., Pavlovich, K., Leibel, R.L., and Hirsch, J. (2008). Leptin reverses  
534 weight loss-induced changes in regional neural activity responses to visual food stimuli. *J. Clin.*  
535 *Invest.* *118*, 2583–2591.

536 Smith, S.M., and Nichols, T.E. (2009). Threshold-free cluster enhancement: addressing problems  
537 of smoothing, threshold dependence and localisation in cluster inference. *Neuroimage* *44*, 83–98.

538 Stoeckel, L.E., Birch, L.L., Heatherton, T., Mann, T., Hunter, C., Czajkowski, S., Onken, L.,  
539 Berger, P.K., and Savage, C.R. (2017). Psychological and Neural Contributions to Appetite Self-  
540 Regulation. *Obesity* *25*, 17–25.

541 van Strien, T., Frijters, J.E.R., Bergers, G.P.A., and Defares, P.B. (1986). The Dutch Eating  
542 Behavior Questionnaire (DEBQ) for assessment of restrained, emotional, and external eating  
543 behavior. *Int. J. Eat. Disord.* *5*, 295–315.

544 Strohacker, K., McCaffery, J.M., MacLean, P.S., and Wing, R.R. (2014). Adaptations of leptin,  
545 ghrelin or insulin during weight loss as predictors of weight regain: a review of current literature.  
546 *Int. J. Obes. (Lond).* *38*, 388–396.

547 Sumithran, P., Prendergast, L.A., Delbridge, E., Purcell, K., Shulkes, A., Kriketos, A., and  
548 Proietto, J. (2011). Long-Term Persistence of Hormonal Adaptations to Weight Loss. *N. Engl. J.*  
549 *Med.* 365, 1597–1604.

550 Torrubia, R., Ávila, C., Moltó, J., and Caseras, X. (2001). The Sensitivity to Punishment and  
551 Sensitivity to Reward Questionnaire (SPSRQ) as a measure of Gray’s anxiety and impulsivity  
552 dimensions. *Pers. Individ. Dif.* 31, 837–862.

553 Unick, J.L., Neiberg, R.H., Hogan, P.E., Cheskin, L.J., Dutton, G.R., Jeffery, R., Nelson, J.A.,  
554 Pi-Sunyer, X., West, D.S., and Wing, R.R. (2015). Weight change in the first 2 months of a  
555 lifestyle intervention predicts weight changes 8 years later. *Obesity (Silver Spring)*. 23, 1353–  
556 1356.

557 Wagner, D.D., Altman, M., Boswell, R.G., Kelley, W.M., and Heatherton, T.F. (2013). Self-  
558 regulatory depletion enhances neural responses to rewards and impairs top-down control.  
559 *Psychol. Sci.* 24, 2262–2271.

560 Weygandt, M., Mai, K., Dommès, E., Leupelt, V., Hackmack, K., Kahnt, T., Rothemund, Y.,  
561 Spranger, J., and Haynes, J.-D. (2013). The role of neural impulse control mechanisms for  
562 dietary success in obesity. *Neuroimage* 83, 669–678.

563 Wing, R., Sinha, M., Considine, R., Lang, W., and Caro, J. (1996). Relationship Between Weight  
564 Loss Maintenance and Changes in Serum Leptin Levels. *Horm. Metab. Res.* 28, 698–703.

565 Woolrich, M.W., Behrens, T.E.J., Beckmann, C.F., Jenkinson, M., and Smith, S.M. (2004).  
566 Multilevel linear modelling for FMRI group analysis using Bayesian inference. *Neuroimage* 21,  
567 1732–1747.

568 Yarkoni, T., Poldrack, R.A., Nichols, T.E., Van Essen, D.C., and Wager, T.D. (2011). Large-

569 scale automated synthesis of human functional neuroimaging data. *Nat. Methods* 8, 665–670.

570

571

572

573

574

575

576

577

578

579

580

581

582

583

584

585

586

587

588



## 589 **Materials and Methods**

### 590 *Participants*

591 29 right-handed participants [1 male, BMI = 30.94 (SD =  $\pm$ 3.76); age = 37.28 (SD =  $\pm$ 7.99)] were  
592 recruited in a private weight loss clinic (“Clinique Motivation Minceur”, Montréal QC Canada)  
593 before they started a prescribed weight-loss regimen. After the protocol was explained, those  
594 accepting to participate signed the consent form, underwent medical history, physical examinations  
595 and blood testing to look for comorbid conditions. Inclusion criteria were: healthy apart from  
596 obesity, and stable weight at least for three months. Exclusion criteria were diabetes, uncontrolled  
597 hypertension, currently smoking, substance abuse and current use of a central nervous system  
598 active medication, renal disease, non-dermatologic cancer in the previous 5 years and current or  
599 history of neurological, eating or psychiatric disorders. Candidates who could not undergo MRI  
600 due to claustrophobia, pregnancy, implanted metal, or BMI > 40 kg/m<sup>2</sup> were also excluded (n = 1).  
601 Each participant received an individualized non-ketogenic calorie-restricted diet program from the  
602 weight loss clinic. The prescribed diets contained 1100-1400 kcal/day, with 40% carbohydrate, 30%  
603 fat and 30% protein. Oral calcium and multivitamins were recommended, as was 30-45 min of  
604 brisk walking per day. Weekly visits included motivational counselling. The study was approved by  
605 the Montreal Neurological Institute Research Ethics Board. Volunteers received compensation for  
606 participation in the form of free nutritional supplements and reimbursement for travel.

607

608 Data from one participant was not included due the presence of uncorrectable fMRI brain artifacts  
609 (n = 1). Lack of button response to more than 25% of the stimulus ratings deemed a run

610 incomplete as it indicated that the participant was not paying attention to the task. Any session with  
611 50 % incomplete runs (3 out of 6 runs) was excluded. Three participants were inattentive during  
612 the fMRI scan during at all 3 sessions (n = 3). In addition, four did not successfully complete the  
613 fMRI at session 2 (leaving n=20) and four (others) at session 3 (leaving n = 20). This reduced the  
614 sample size for comparing baseline to month 1 to 20 participants, and the comparison of month 1  
615 to month 3 to 16 participants. Participants were contacted at two years following the experiment.  
616 Of 19 respondents, weights were reported by 10, and measured in 9. Of these 19 respondents, 14  
617 people completed all three sessions of the fMRI successfully. Weight at two years is calculated as  
618 the percent change of weight from baseline to two years (n = 19); and weight regain as the percent  
619 change of weight from month 3 to two years (n = 14).

620

### 621 *Experimental Design*

622 Participants underwent fMRI on three occasions: first immediately prior to initiation of the diet  
623 program, then at month 1 and month 3 during calorie restriction. Women were scanned during  
624 the luteal phase of their menstrual cycle. The scanning sessions started between 12:00 and 1:30  
625 PM and kept the same schedule for the three sessions. On the scan days, participants presented  
626 themselves to the lab in the morning, having fasted from midnight the night before. All participants  
627 received the same standardized breakfast. This included  $\frac{3}{4}$  cup of 2% milk, 1 slice of brown toast,  
628 10 mL of peanut butter, one medium-sized hard -boiled egg, one small apple, a protein bar and  
629 150 mL of black coffee or tea without sugar. It contained 550 kcal, 43% carbohydrate, 32% fat and  
630 25% protein and was eaten over 10-15 minutes. Venous blood samples were drawn through a  
631 stopcock in an antecubital vein immediately prior to breakfast, then at 30, 60, 120 and 180 min

632 (just prior to the fMRI scan) then just after the scan at 300 min (Fig.1) to measure hormone levels  
633 (see below). In addition, at each session, blood tests were conducted to measure C reactive protein,  
634 ketones, cholesterol, triglyceride, and glycated hemoglobin (HbA1c) levels (Table S2). Participants  
635 were confirmed to have negative blood ketones at each session.

636

### 637 *Psychological, Physical Activity, Hunger Measures*

638 Participants completed the Binge Eating Scale, the Dutch Eating Behavior (van Strien et al., 1986)  
639 and Power of Food Questionnaires (Lowe et al., 2009) to assess the eating styles. Sensitivity to  
640 reward and punishment was assessed using the Sensitivity to Punishment and Sensitivity to Reward  
641 Questionnaire (Torrubia et al., 2001) and the BIS/BAS Scale (Carver and White, 1994),  
642 depression levels using the Beck Depression Inventory (Beck A.T., 1972), and chronic stress  
643 during the previous month using the Perceived Stress Scale (PSS) (Cohen et al., 1983) (Table S1).  
644 Participants reported their activity levels over the past week by answering two questions: “Using the  
645 past week a reference, how much time have you given to the following activities? Jogging, cycling,  
646 swimming, cross-country skiing, aerobic dance or other similar activities.” and “Over the past week,  
647 how much time have you spent doing strenuous work, a physical activity or a sport other than  
648 those mentioned in the previous question?” The mean scores from these two questions were used  
649 to calculate changes in self-reported exercise (Table S2). Hunger levels were assessed using Visual  
650 Analog Scales (VAS) four times throughout the day across the sessions (Fig. 1). On the VAS, we  
651 asked the participants “On a scale from 0 to 10 how hungry do you feel now?” (Table S3).

652

653

654 *Hormone Measurements*

655 The blood samples were centrifuged, and plasma and serum stored at -80C until analysis. All  
656 samples from each participant were measured within the same assay. Plasma glucose was measured  
657 by the glucose-oxidase technique (GM-9, Analox Instruments, Lunenburg, MA, USA), and insulin  
658 using a specific radioimmunoassay (RIA) (Millipore, Billerica, MA, USA). We measured both  
659 total and acylated ghrelin, as the latter is considered “active”. Samples required acidification before  
660 storage to prevent degradation (Hosoda and Kangawa, 2012). Both were measured by RIA  
661 (Millipore, Billerica, MA, USA). Leptin was assayed using a solid phase ELISA (R&D Systems  
662 Inc, Minneapolis, MN, USA). The HOMA -IR (insulin resistance) index was calculated as fasting  
663  $(\text{glucose} \times \text{insulin})/22.5$ .

664

665 *MRI*

666 Neuroimaging was carried out with a Siemens Magnetom Trio 3T MRI scanner at the Montreal  
667 Neurological Institute (MNI). High-resolution T1-weighted anatomical images with voxel size =  
668 1x1x1 mm were obtained first. Functional data were acquired with an echo-planar T2\*weighted  
669 sequence for BOLD contrast (TR = 2 s; TE = 30 ms; flip angle, 90°; FOV = 224mm, voxel size =  
670 3.5 x 3.5 x 3.5 mm<sup>3</sup>, number of slices = 38).

671 For each session, participants underwent six 7-minute functional runs. During each run subjects  
672 viewed images of food or scenery, presented via a projector and a mirror placed on the head coil.  
673 The food and scenery images (examples in Fig.1) had been previously matched for visual appeal  
674 (Malik et al., 2008). Each run comprised 36 unique images, 12 each of high and low-calorie foods  
675 (e.g. brownies, vegetables) and scenery (Fig.1). The order of picture presentation was randomized

676 across subjects and runs. Images were presented for 4.0 seconds and were followed by a rating of  
677 the stimulus on a 1-4 scale. For food pictures, participants rated “How appetizing is this stimulus?”  
678 and for scenery pictures participants rated “How pleasant is this stimulus?”. Rating was followed by  
679 a fixation cross with a jittered interstimulus interval (2.5-6.0 seconds). Stimulus presentation was  
680 done using E-Prime (Psychology Software Tools Inc, Sharpsburg PA, USA). Ratings were entered  
681 by subjects via a MR-compatible button device.

682

### 683 **Quantification and Statistical Analysis**

#### 684 *Hormone and Behavioral Analysis*

685 The values and descriptive statistics for the hormone measurements are listed in Table S3. The  
686 statistical analysis of hormonal and psychological measures was conducted using MATLAB  
687 (Version R2015a, The MathWorks Inc., Natick, MA, USA). We log-transformed leptin and  
688 insulin values to correct for non-normality. The longitudinal analyses were run using linear mixed  
689 effects modelling (MATLAB function fitlme) with subject as a random effect. The Akaike  
690 information criterion was utilized to select the best model (Table S4). To compare across sessions  
691 and across time points, and to calculate the F and p values, we conducted linear hypothesis testing  
692 on the linear mixed regression model coefficients using CoefTest implemented in MATLAB. The  
693 graphs were produced using the raw data, but the statistical analyses reported were based on linear  
694 mixed effect models. For correlations, we conducted Spearman rank correlations when the  
695 distribution was not normal.

696

#### 697 *Imaging Data Analysis*

698 The T1-weighted MRIs were submitted to brain extraction using BEaST, a nonlocal segmentation  
699 method applied to the images linearly registered to ICBM-MNI template (Eskildsen et al., 2012).  
700 Pre-processing of the BOLD data was conducted using FEAT (FMRI Expert Analysis Tool,  
701 Version 6, part of FMRIB's Software, [www.fmrib.ox.ac.uk/fsl](http://www.fmrib.ox.ac.uk/fsl)) and consisted of slice timing motion  
702 correction, spatial smoothing (6mm), and high-pass filtering with a cut-off frequency of 0.1 Hz  
703 (Jenkinson et al., 2012). Linear registration (6 parameters) to T1-weighted and non-linear  
704 registration to standard T1-weighted ICBM-MNI152 template brain (voxel size= 2x2x2 mm<sup>3</sup>) were  
705 completed using FLIRT (Jenkinson et al., 2002) and FNIRT (Andersson et al., 2007) respectively,  
706 prior to statistical analysis.

707

#### 708 *Imaging Statistics*

709 For the first-level statistical analysis of the BOLD time-series, a general linear model (GLM) was  
710 implemented using FILM (Woolrich et al., 2004). The regressors for the GLM were the motion  
711 parameters, button presses for ratings, missed events, and the food and scenery image presentation  
712 events which were modeled by convolving the time course with a double-gamma hemodynamic  
713 response function (HRF) and applying temporal filtering. The resulting contrast images (i.e. food  
714 minus scenery) were then passed onto a second-level fixed-effects analysis for each subject, to  
715 obtain mean contrast estimates over runs within subjects by forcing random effects variance to zero  
716 in FLAME (FMRIB's Local Analysis of Mixed Effects) (Beckmann et al., 2003; Woolrich et al.,  
717 2004) The t-stat maps for the contrast of interest (i.e., session1 vs. session2, session2 vs. session3,  
718 etc.) were combined across subjects for the third-level analysis.

719

720 In the third level analysis, the results at the group level were analyzed using non-parametric  
721 permutation tests ( $n = 5,000$  permutations) with the threshold-free cluster enhancement (TFCE)  
722 algorithm using randomize in FSL (Smith and Nichols, 2009). In order to explore how the percent  
723 weight loss or changes in hormone levels affected the reactivity to food cues (i.e. food vs. scenery  
724 images), we included them as regressors in the GLM model. We utilized percent change in weight  
725 loss to account for baseline weight.

726

727 To analyze the effects of weight loss on value related activity for food items, we performed a region  
728 of interest analysis using a mask from a fMRI meta-analysis for subjective value at the time of  
729 decision (see Fig.6A from (Bartra et al., 2013)). In addition, we investigated how weight loss related  
730 to changes in BOLD in regions implicated in cognitive control. For this purpose, we restricted our  
731 analysis to a regional forward-inference mask associated with the term “cognitive control” in the  
732 NeuroSynth database of fMRI studies (<http://neurosynth.org/analyses/terms/cognitive%20control/>)  
733 (Yarkoni et al., 2011). Featquery from FSL was utilized to extract the percent change in mean beta  
734 parameter estimates in each ROI that was used for plotting.

735

### 736 *Functional Connectivity Analysis*

737 For functional connectivity analysis we utilized psychophysiological interaction (PPI)(O’Reilly et  
738 al., 2012). We selected a seed region based on the peak coordinate of food minus scenery at  
739 session 1 minus session 2 (MNI:  $x = -10$ ,  $y = 34$ ,  $z = -12$ ). This peak was used to form a 4 mm  
740 diameter seed region of interest (ROI) in the vmPFC. We further transformed this ROI in

741 standard space into each individual's functional space using the previously obtained linear  
742 transformations (from FLIRT). For each subject, we determined the peak voxel within the ROI,  
743 and used it to create a new 4mm subject-specific ROI used to extract the mean BOLD time-series  
744 signal. The mean time series of the seed ROI and the contrast of interest (i.e. food cues vs. scenery  
745 images) were multiplied to create the PPI regressor in the first level analysis. Higher-level analysis  
746 was repeated as stated above.

747 For all of the univariate results reported here, the significance of the clusters was determined by  
748 threshold-free cluster enhancement (TFCE) with a significance level of  $p < 0.05$  family wise error  
749 rate (FWER). All coordinates are given in MNI space.

750
